# Supplementary material for: Localized Delivery of Pilocarpine to Hypofunctional Salivary Glands through Electrospun Nanofiber Mats: An Ex Vivo and In Vivo Study
Source: MDPI journal article supplement (doi:10.3390/ijms20030541), 2019-01-28
Supplement: s1 [file s1]

**Supplementary Table S1.** Table displaying the three fabricated nanofiber mats with different diameters (0.5, 1 and 2mm) and similar internal morphology and structural properties (thickness, mesh porosity, and nanofiber diameter).

| Nanofiber mat diameters<br>(mm) | Total pilocarpine<br>( $\mu$ g) | Total nanofiber<br>( $\mu$ g) |
|---------------------------------|---------------------------------|-------------------------------|
| 0.5                             | 0.21                            | 25                            |
| 1                               | 0.42                            | 50                            |
| 2                               | 0.84                            | 100                           |

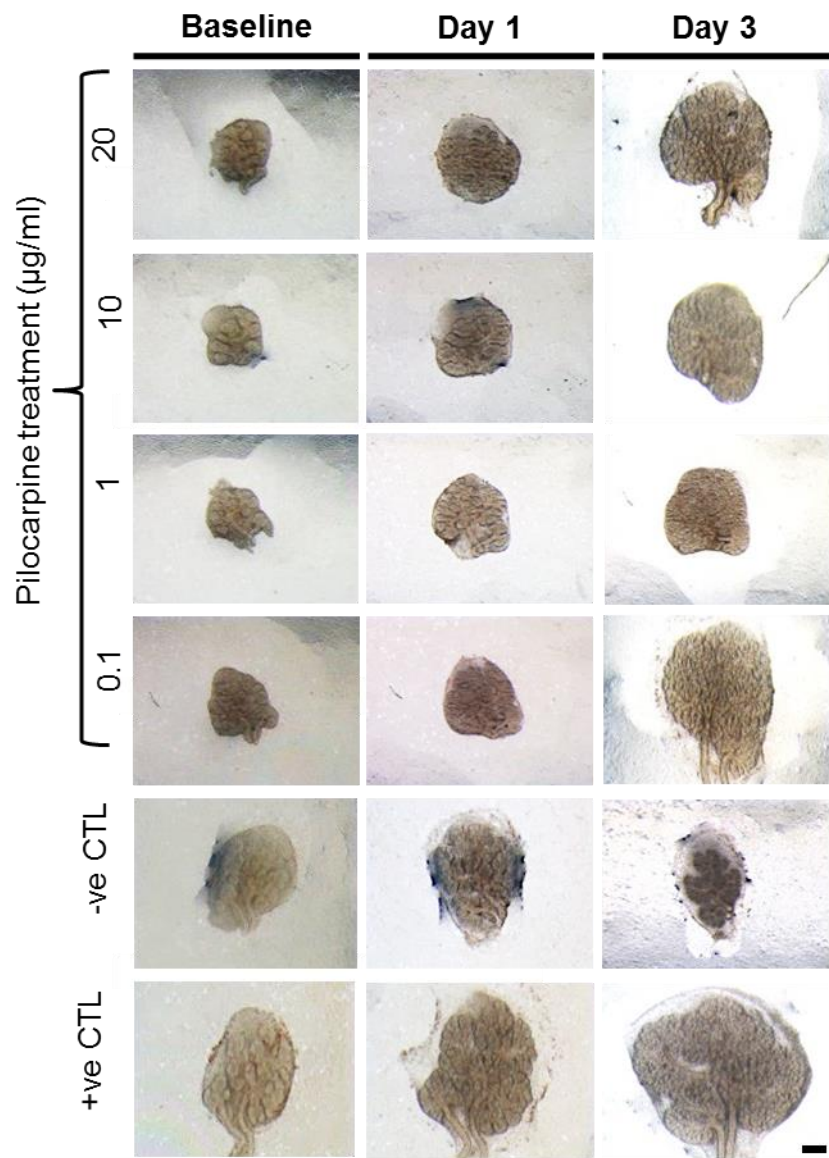

**Supplementary Figure S1.** Salivary gland growth shown in brightfield microscopy before and after treatment with pilocarpine-loaded nanofiber discs in the *ex vivo* SG culture model. Legend: +ve CTL: treated with growth media only. -ve CTL: treated with gamma radiation in growth media only to induce cytotoxicity. Mag.: 3.2x. Scale bar: 100 $\mu\text{m}$
